# Supplementary material for: Evidence for transient, local ion foreshocks caused by dayside magnetopause reconnection
Source: Copernicus journal article supplement (doi:10.5194/angeo-34-943-2016), 2016-11-04
Supplement: Supplementary file 1 [file angeo-34-943-2016-supplement.zip]

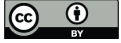

*Supplement of*

**Evidence for transient, local ion foreshocks caused by dayside magnetopause reconnection**

**Yann Pfau-Kempf et al.**

*Correspondence to:* Yann Pfau-Kempf ([yann.kempf@helsinki.fi](mailto:yann.kempf@helsinki.fi))

- [angeo-34-943-2016-supplement-title-page.pdf](#)
- [BCB\\_animation\\_fullres\\_3710.mp4](#)

The copyright of individual parts of the supplement might differ from the CC-BY 3.0 licence.
